# Supplementary material
Source: PubMed Central journal article supplement (PMC8574208)
Supplement: NIHMS1741263-supplement-SI.pdf [file NIHMS1741263-supplement-SI.pdf]

Supporting Information

# Microbubbles Cloaked with Hydrogels as Activatable Ultrasound Contrast Agents

*Mary W. N. Burns<sup>†,||</sup>, Robert F. Mattrey<sup>†,‡</sup> and Jacques Lux<sup>\*,†,§,⊥</sup>*

<sup>†</sup> Department of Radiology, Translational Research in Ultrasound Theranostics (TRUST)  
Program, University of Texas Southwestern Medical Center, Dallas, Texas 75390, United States

<sup>‡</sup> Advanced Imaging Research Center, Dallas, Texas 75390, United States

<sup>§</sup> Biomedical Engineering Graduate Program, University of Texas Southwestern Medical Center,  
Dallas, Texas 75390, United States

<sup>||</sup> Biochemistry Graduate Program, University of Texas Southwestern Medical Center, Dallas,  
Texas 75390, United States

<sup>⊥</sup> Organic Chemistry Graduate Program, University of Texas Southwestern Medical Center,  
Dallas, Texas 75390, United States

## Corresponding Author

\* Dr. Jacques Lux, Tel: (214) 648-5093. Fax: (214) 648-5097. E-mail address:

[Jacques.Lux@UTSouthwestern.edu](mailto:Jacques.Lux@UTSouthwestern.edu)

**Figure S1.**  $^1\text{H}$  NMR spectrum of A-HA-SH ..... p: 3

**Figure S2.** Representative US images of HA-MBs and CPS signal activation ..... p: 4

**Figure S3.** Representative US images of imine-crosslinked MBs and CPS signal activation... p: 4

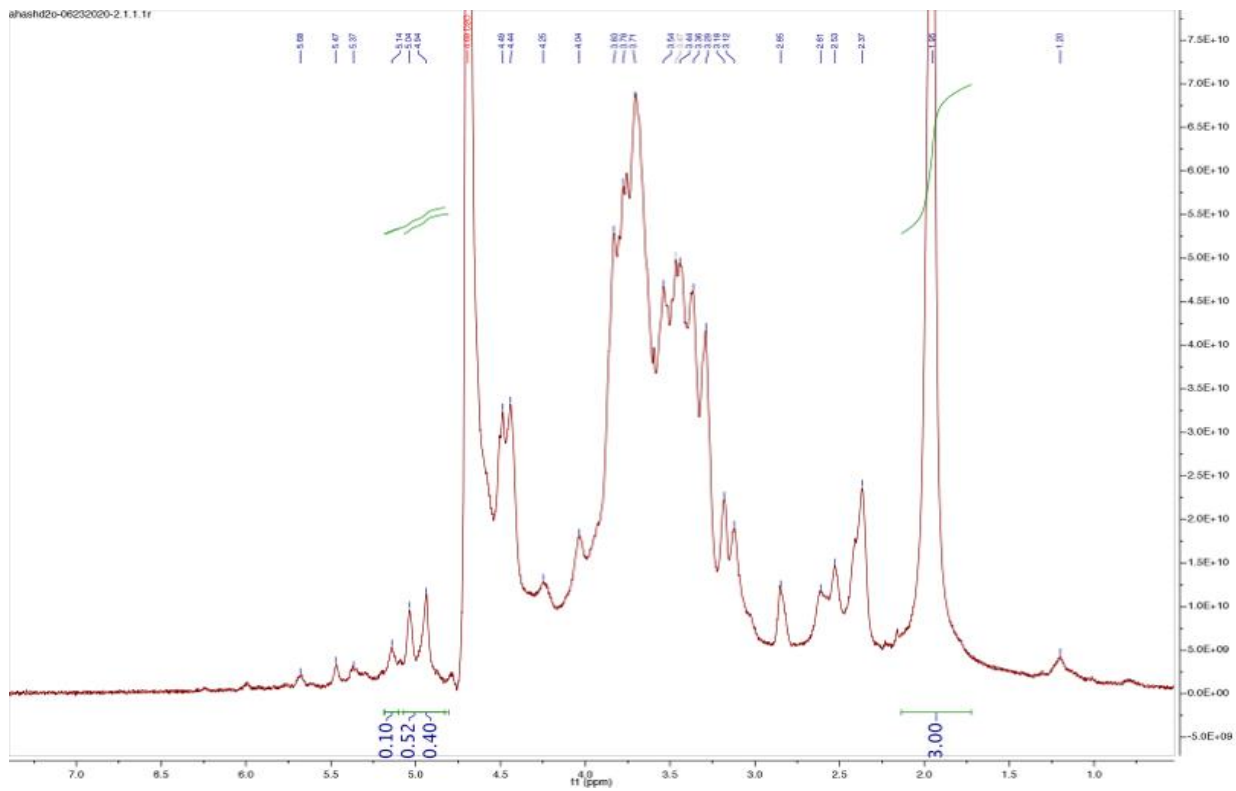

**Figure S1.** <sup>1</sup>H NMR spectra of A-HA-SH, showing characteristic aldehyde peaks.

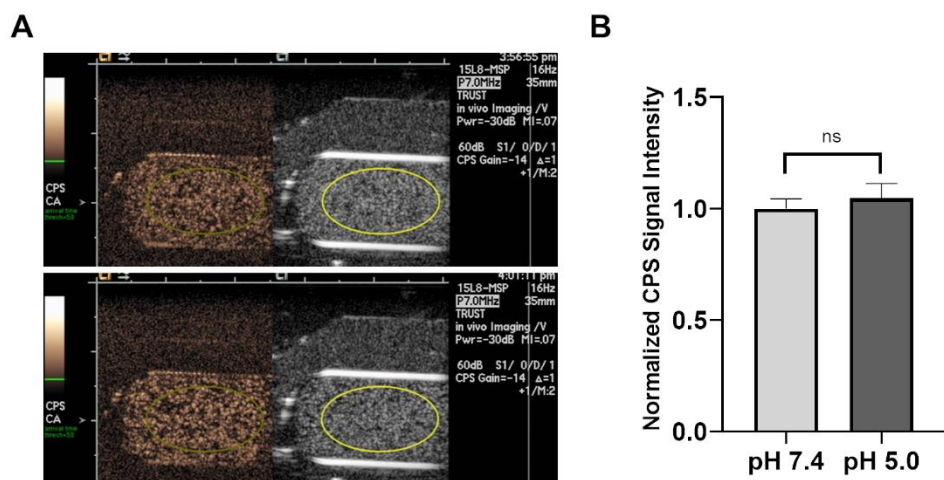

**Figure S2.** (A) Representative US images of HA-MBs before (top) and after (bottom) acidification and (B) CPS signal fold activation. ns = not statistically significant:  $p > 0.05$  ( $n = 3$ ). Error bars represent standard deviation.

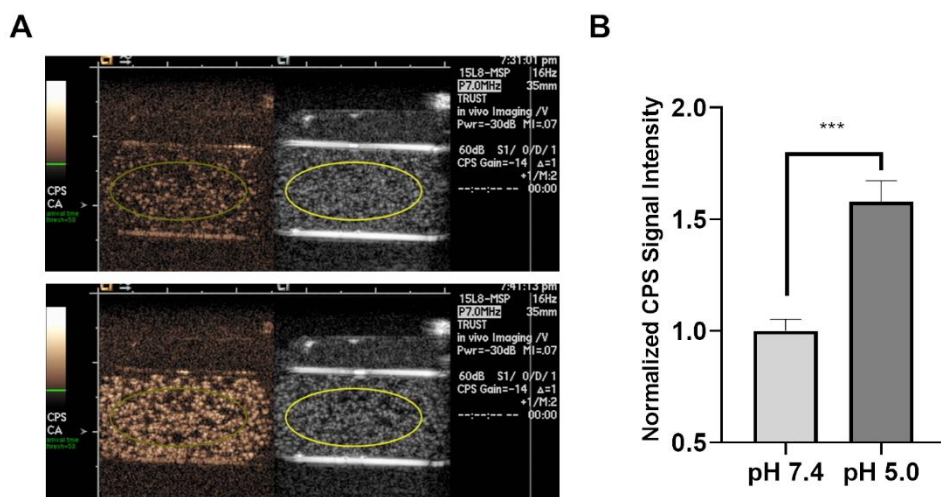

**Figure S3.** (A) Representative US images of imine-crosslinked pH-MBs before (top) and after (bottom) acidification and (B) CPS signal fold activation. \*\*\* $p < 0.001$  ( $n = 3$ ). Error bars represent standard deviation.
